# Supplementary material
Source: HighWire-hosted journal article supplement (https://www.annfammed.org/highwire/filestream/26577/field_highwire_adjunct_files/0/Muendo_VA.pdf)
Supplement: Muendo_VA.pdf [file Muendo_VA.pdf]

# Exploring HIV Self-Testing: Barriers and Facilitators Among Undergraduate Students in Nairobi, Kenya

*Source:* Muendo NK, Thigiti J, Tembu O, et al. Exploring HIV self-testing: barriers and facilitators among undergraduate students in Nairobi, Kenya. *Ann Fam Med.* 2024;22:10.1370/afm.3169

*The study highlights the role of school-based interventions and family support in HIV prevention, showing strong HIV knowledge among participants and the need for targeted education and stigma reduction to improve self-testing uptake.*

Have tested  
for HIV

65%

Never used an  
self-test kit

75%

- Predominantly single, female, and full-time students with an average age of 21.1 years demonstrated substantial HIV knowledge with 71.2% favoring facility-based testing (voluntary counseling and testing).
- Only 25% have ever used a self-test kit with 60.8% preferring the OraQuick self-test kit.

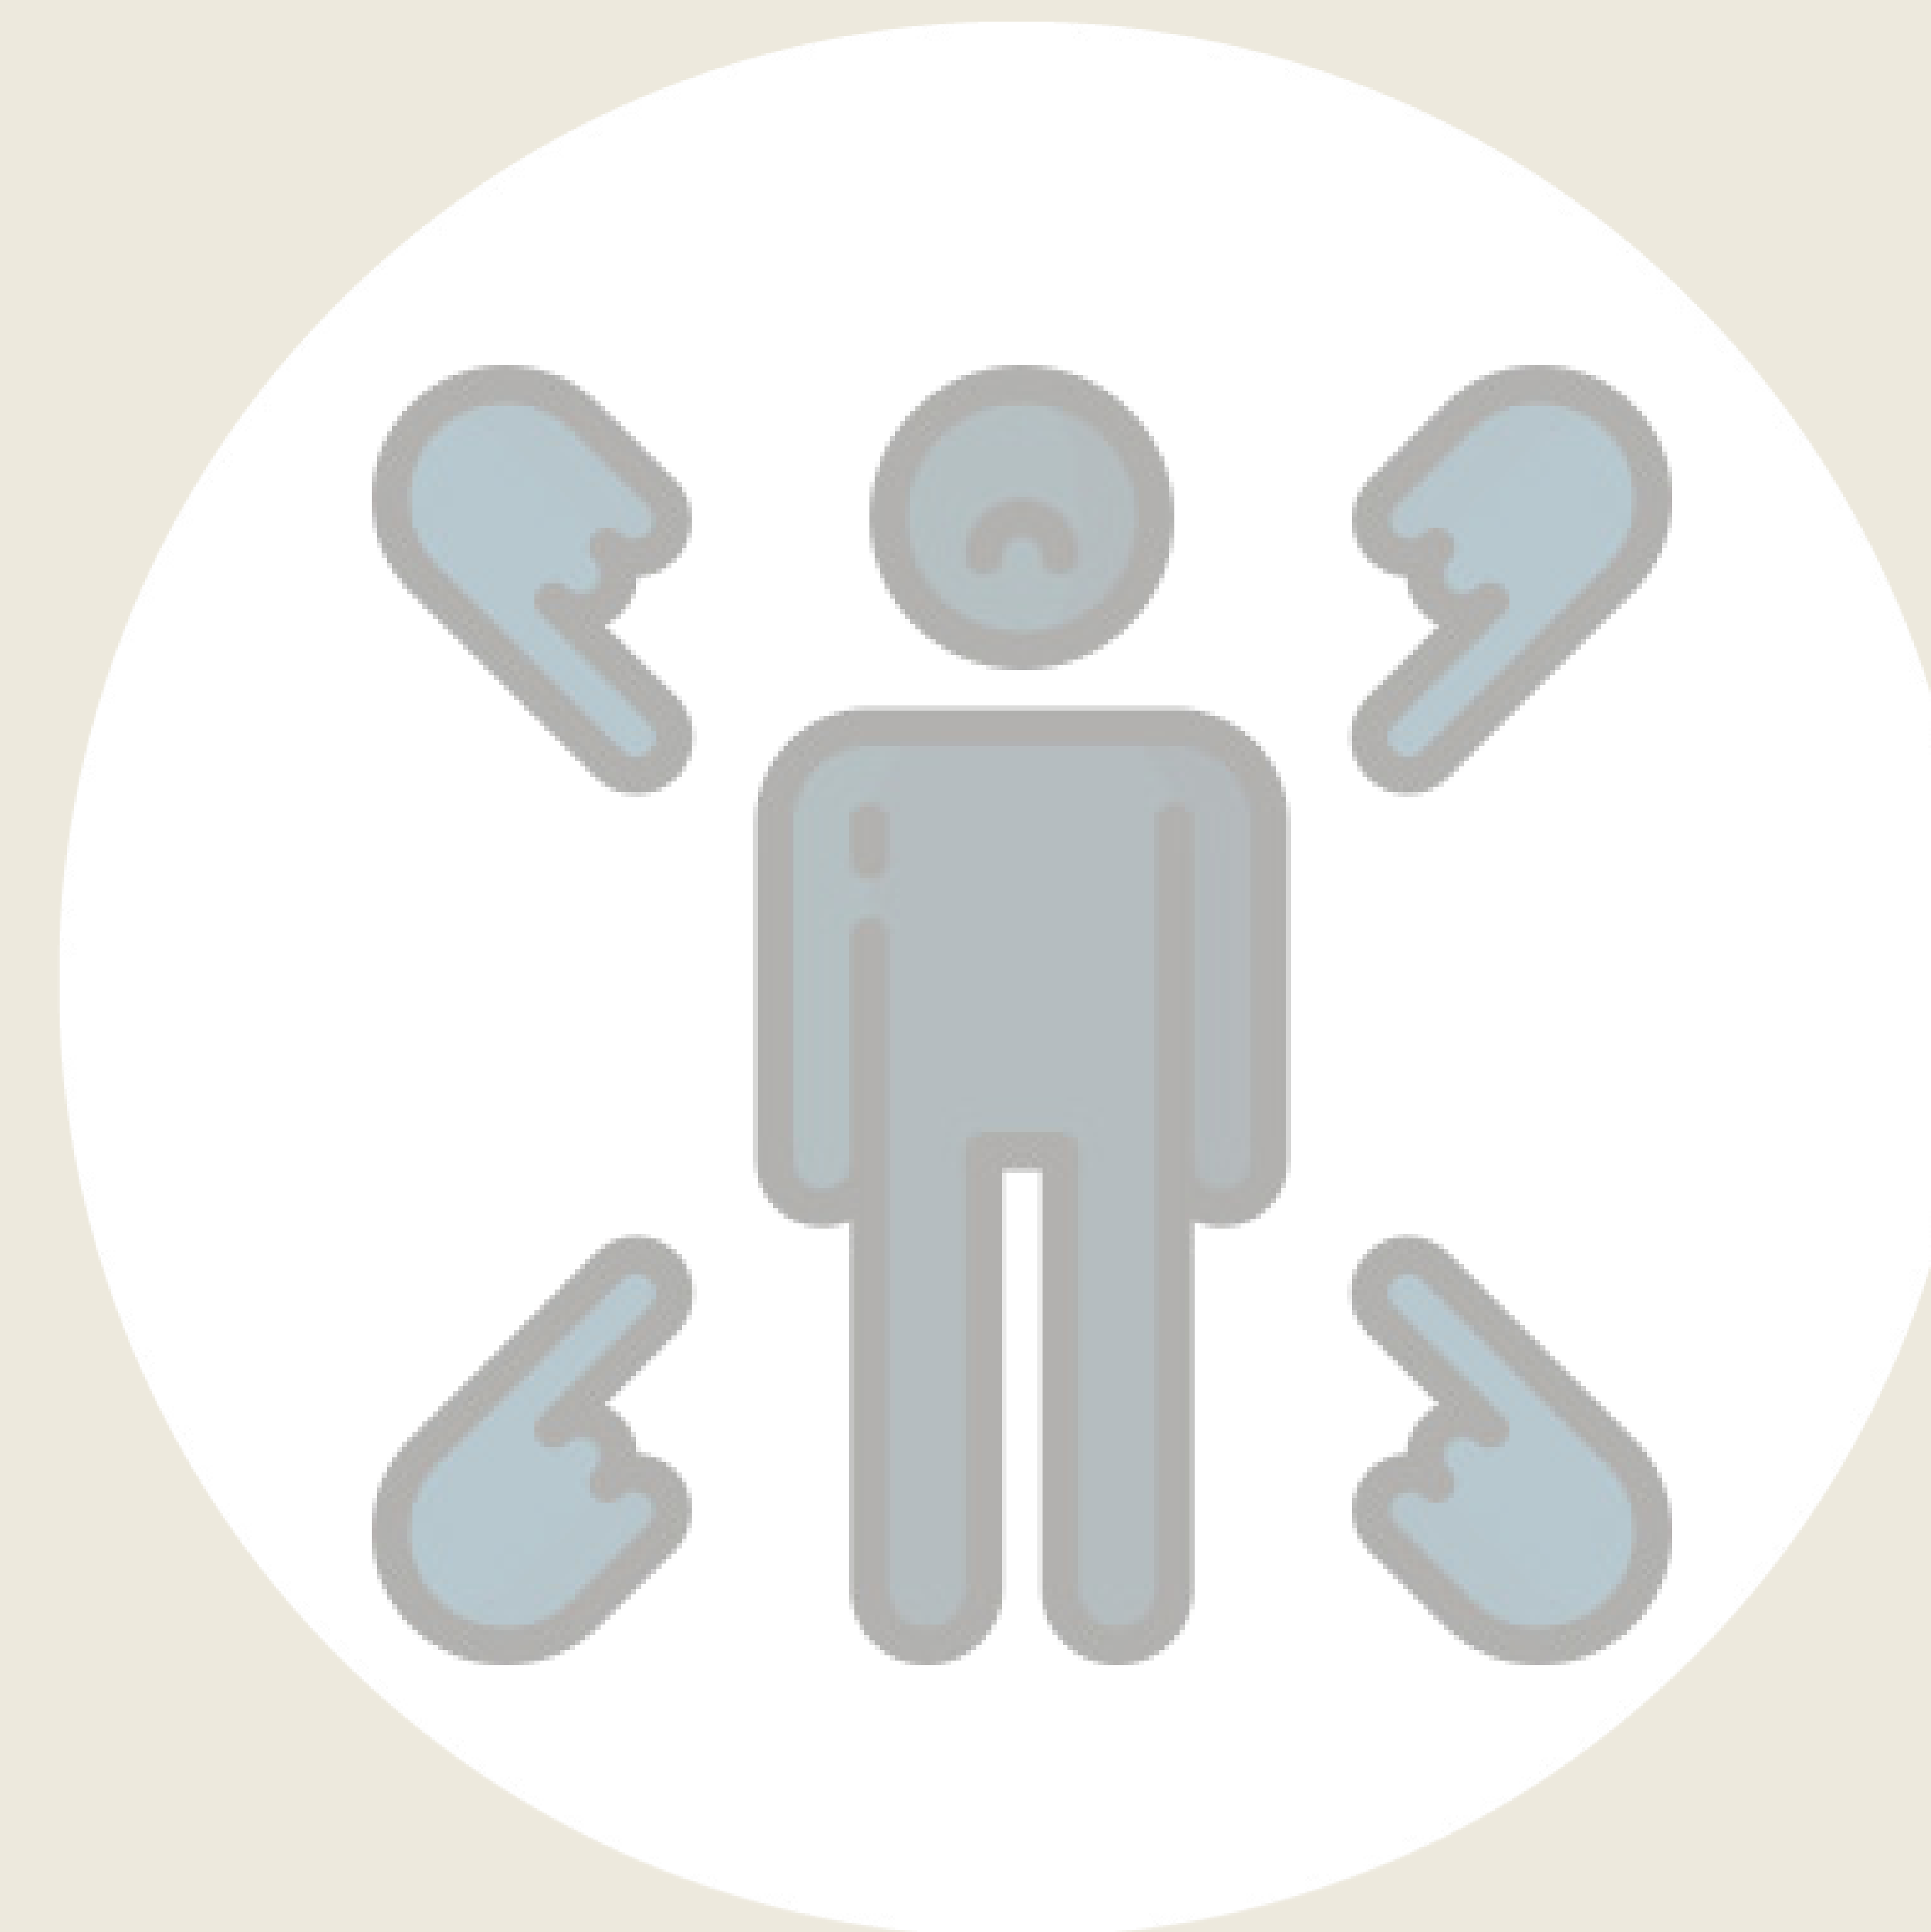

Fear of positive results and stigma were primary barriers for self-testing, while motivations for self-testing included routine use and protecting loved ones.

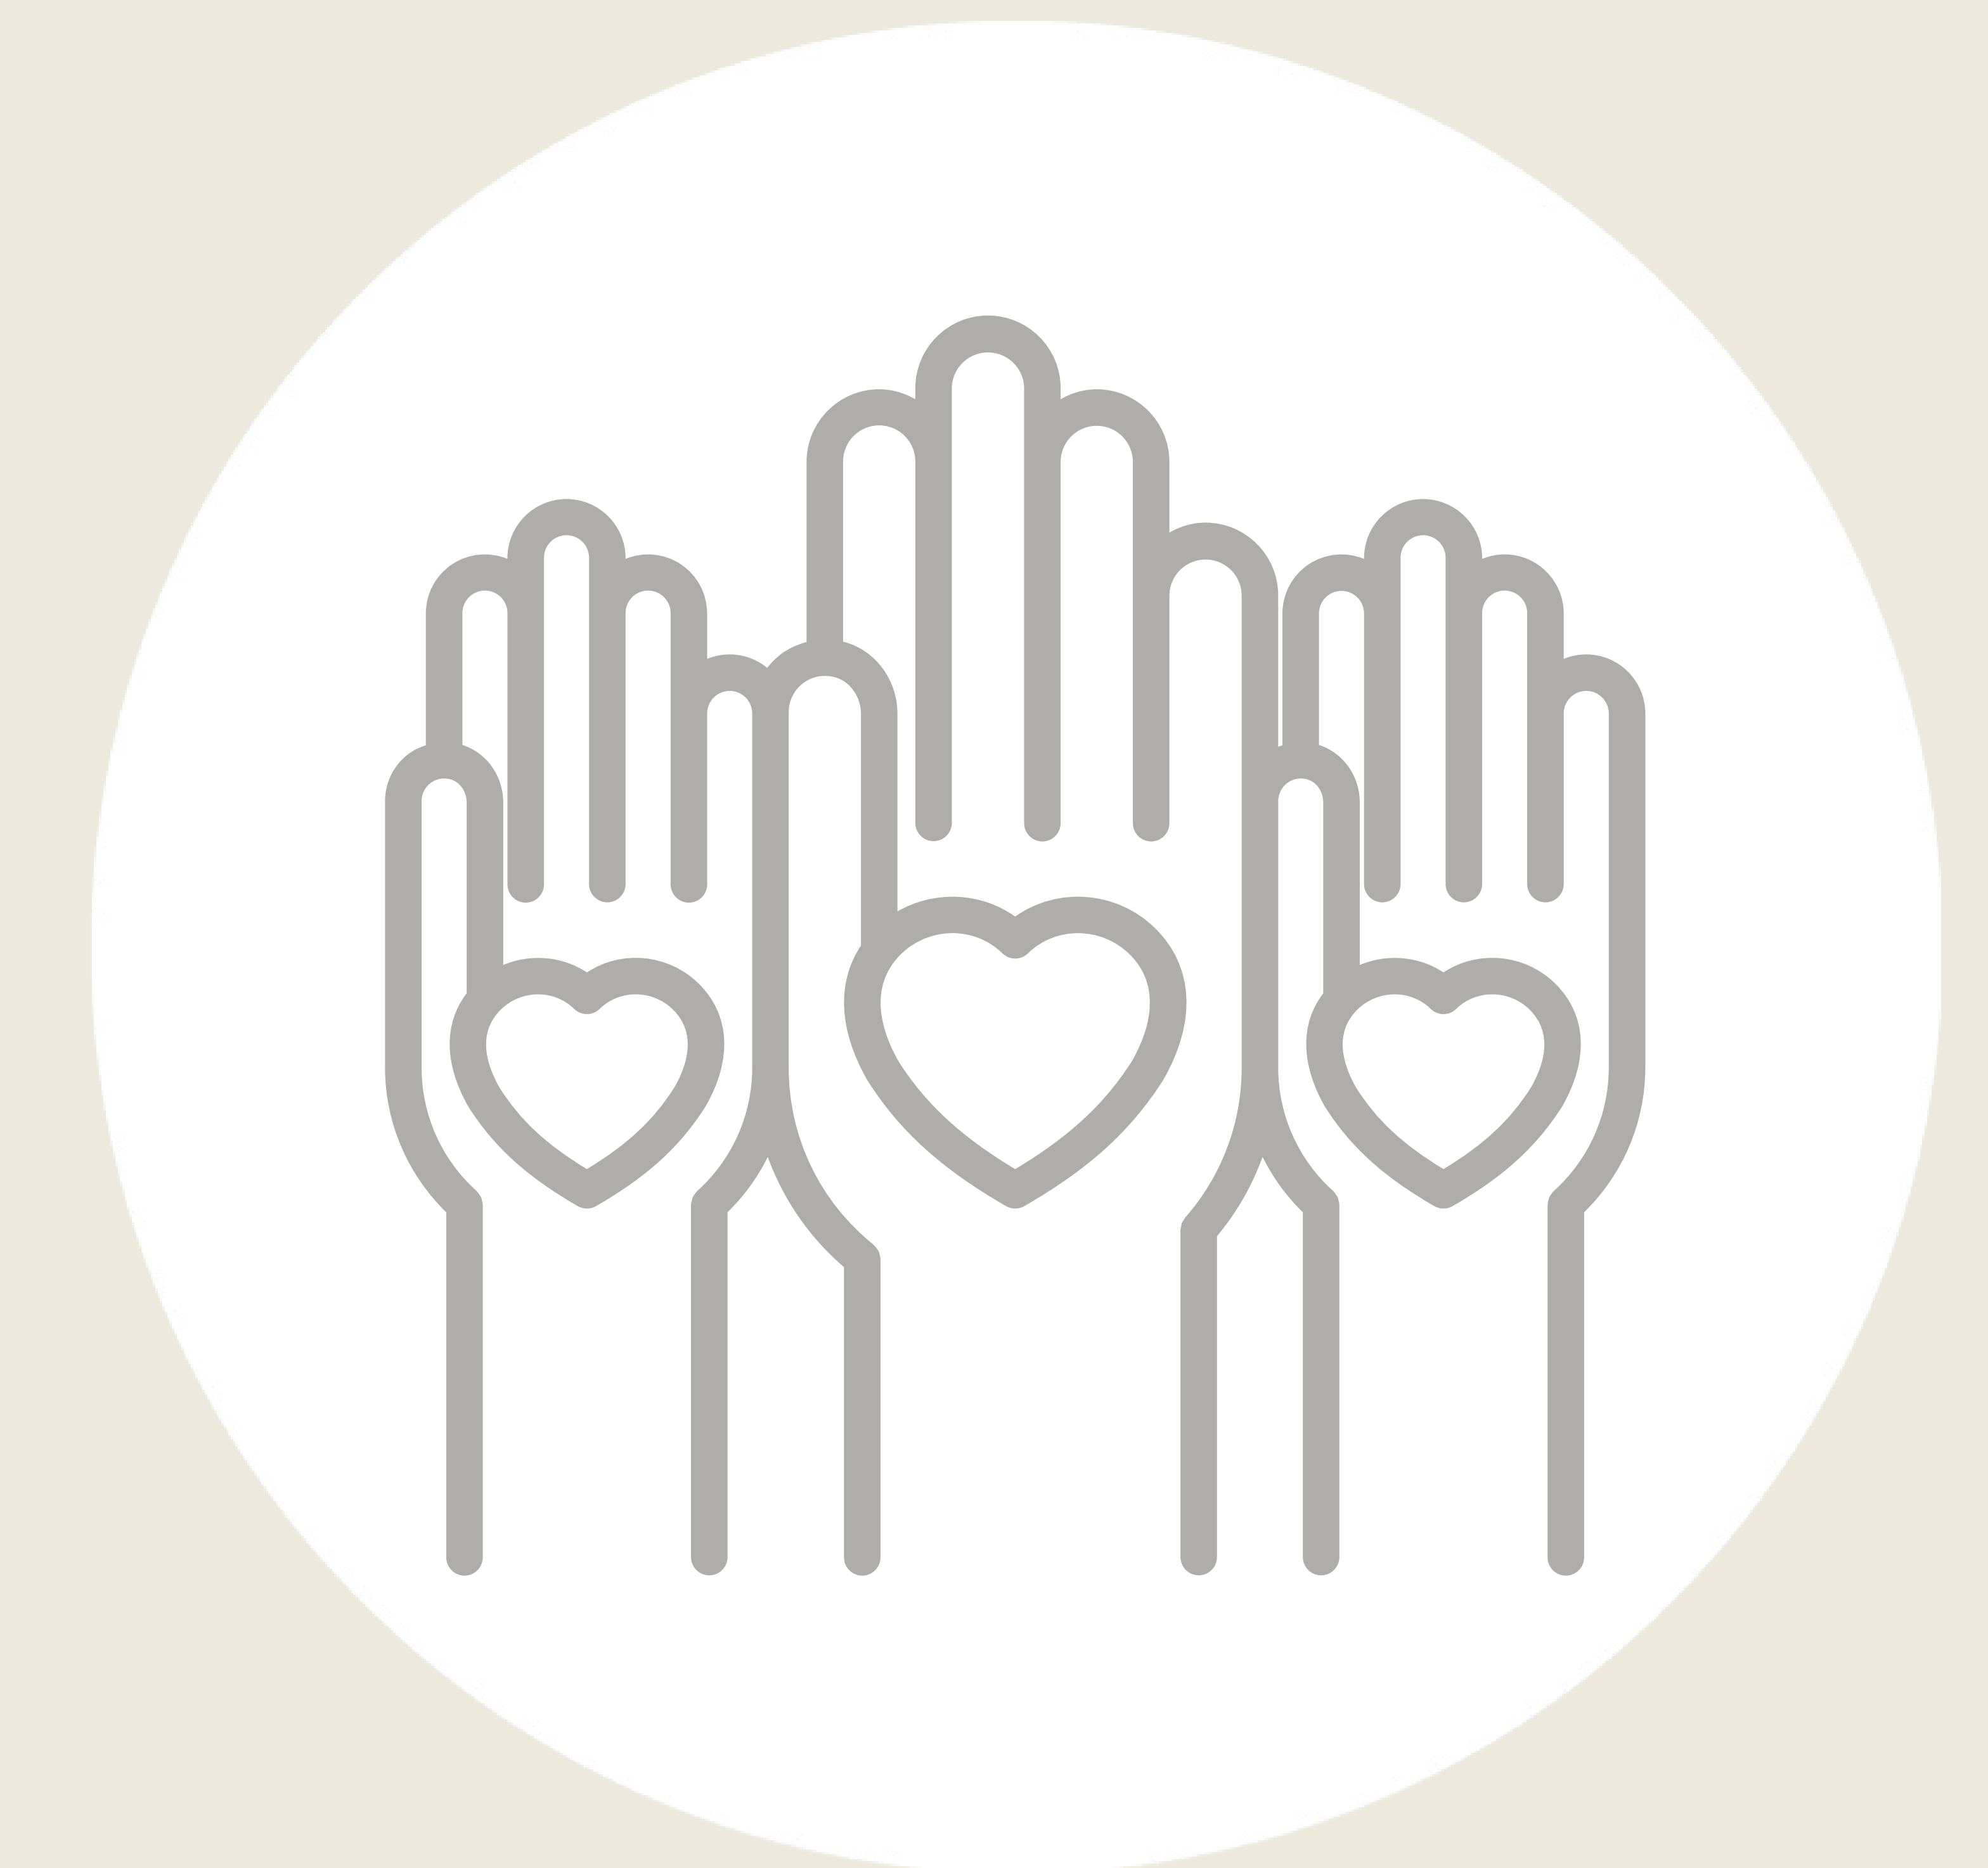

Integrating HIV self-testing into current prevention programs may strengthen HIV care frameworks in East Africa by destigmatizing HIV, ensuring testing privacy, and addressing misconceptions.
